# Supplementary material
Source: Springer Nature journal article supplement (https://www.springermedizin.de/resource/supplementary/13002_2012_360_MOESM4_ESM.pdf/9627714)
Supplement: MOESM4 [file 9627714]

**Plant**

*Pilosocereus pachycladus* F.Ritter (Facheiro)

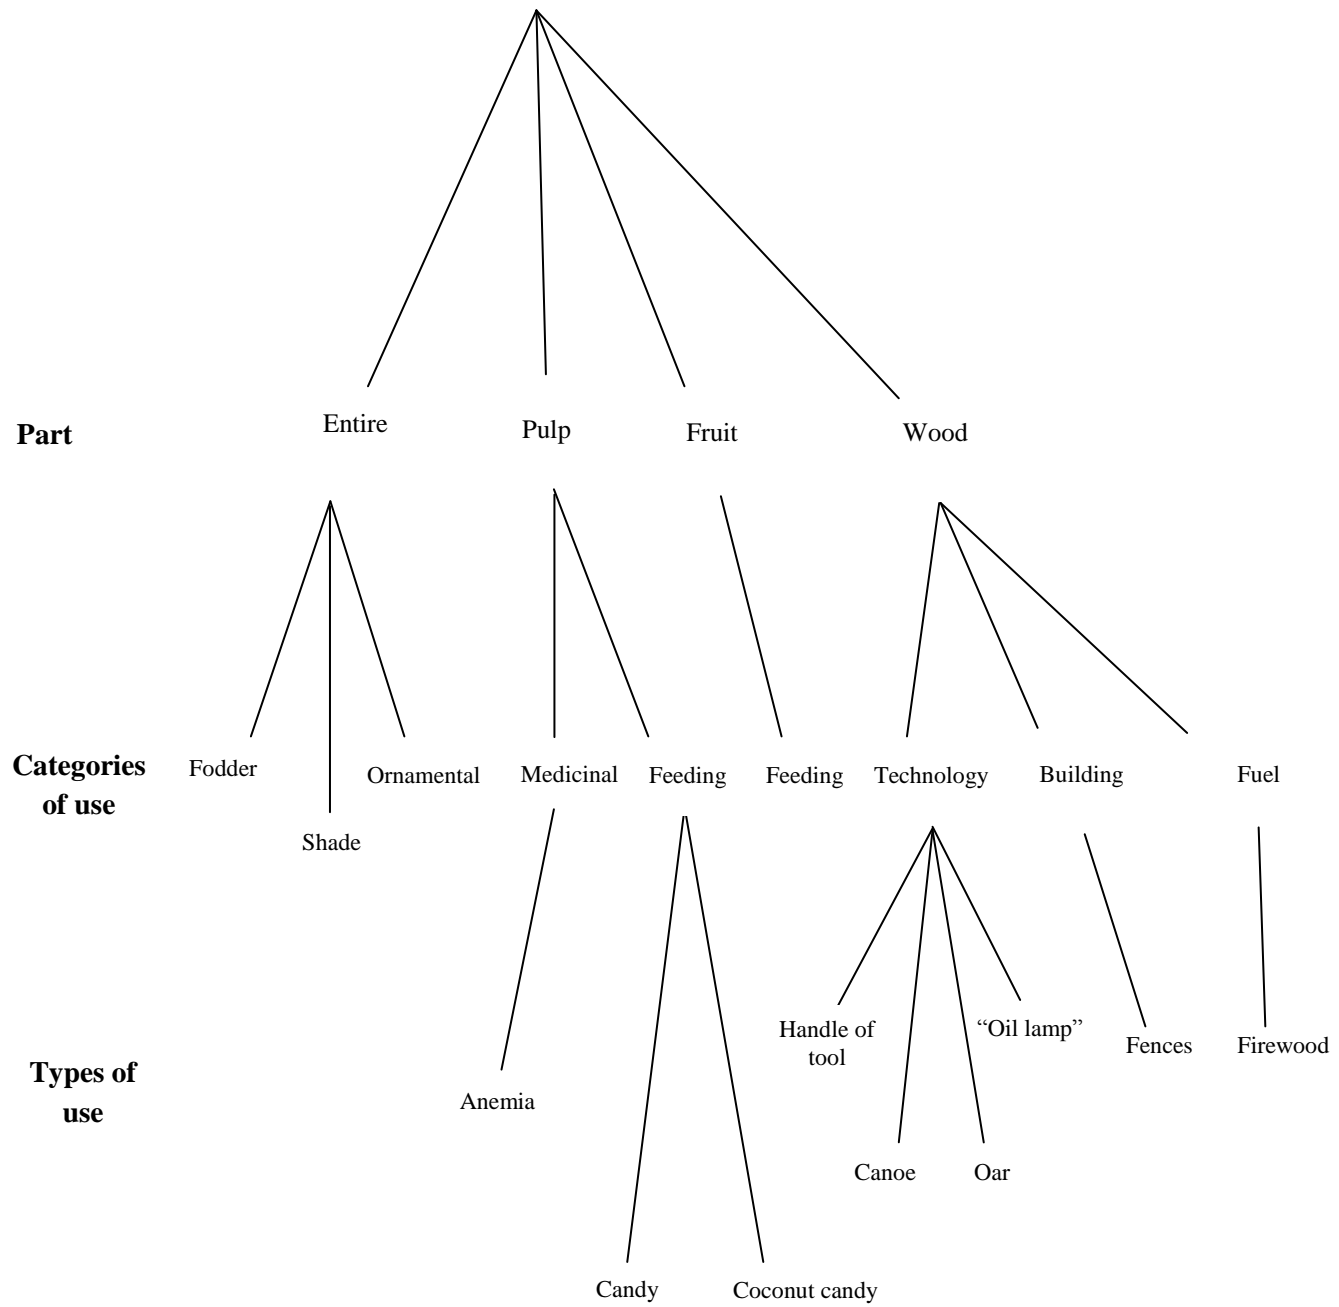

**Figure 5.** Categories of use of specie most commonly cited by residents of the community São Francisco in Cabaceiras, Paraíba (Northeastern Brazil).
